# Supplementary material for: Anchoring MOF-derived CoS2 on sulfurized polyacrylonitrile nanofibers for high areal capacity lithium–sulfur batteries
Source: Royal Society of Chemistry journal article supplement (doi:10.1039/c9ta11390h), 2019-12-09
Supplement: c9ta11390h1.pdf [file c9ta11390h1.pdf]

## **Anchoring MOF-derived CoS<sub>2</sub> on Sulfurized Polyacrylonitrile Nanofibers for High Areal Capacity Lithium Sulfur Batteries**

*Amir Abdul Razzaq<sup>a,b</sup>, Xietao Yuan<sup>a,b</sup>, Yujie Chen<sup>a,b</sup>, Jiapeng Hu<sup>a,b</sup>, Qiaoqiao Mu<sup>a,b</sup>, Yong Ma<sup>a,b</sup>,  
Xiaohui Zhao<sup>a,b,\*</sup>, Lixiao Miao<sup>c</sup>, Jou-Hyeon Ahn<sup>d</sup>, Yang Peng<sup>a,b</sup> and Zhao Deng<sup>a,b,\*</sup>*

<sup>a</sup>*Soochow Institute for Energy and Materials Innovations, College of Energy, Soochow University,  
Suzhou 215006, China*

<sup>b</sup>*Key Laboratory of Advanced Carbon Materials and Wearable Energy Technologies of Jiangsu  
Province, Soochow University, Suzhou 215006, China*

<sup>c</sup>*Haike Research Institute, Haike Group, Dongying 257000, China*

<sup>d</sup>*Department of Materials Engineering and Convergence Technology, Gyeongsang National  
University, 501 Jinju-daero, Jinju 52828, Republic of Korea*

Corresponding authors\*

Tel: +86-512-6716-7407; E-mail: zhaoxh@suda.edu.cn

Tel: +86-512-6716-7407; E-mail: zdeng@suda.edu.cn

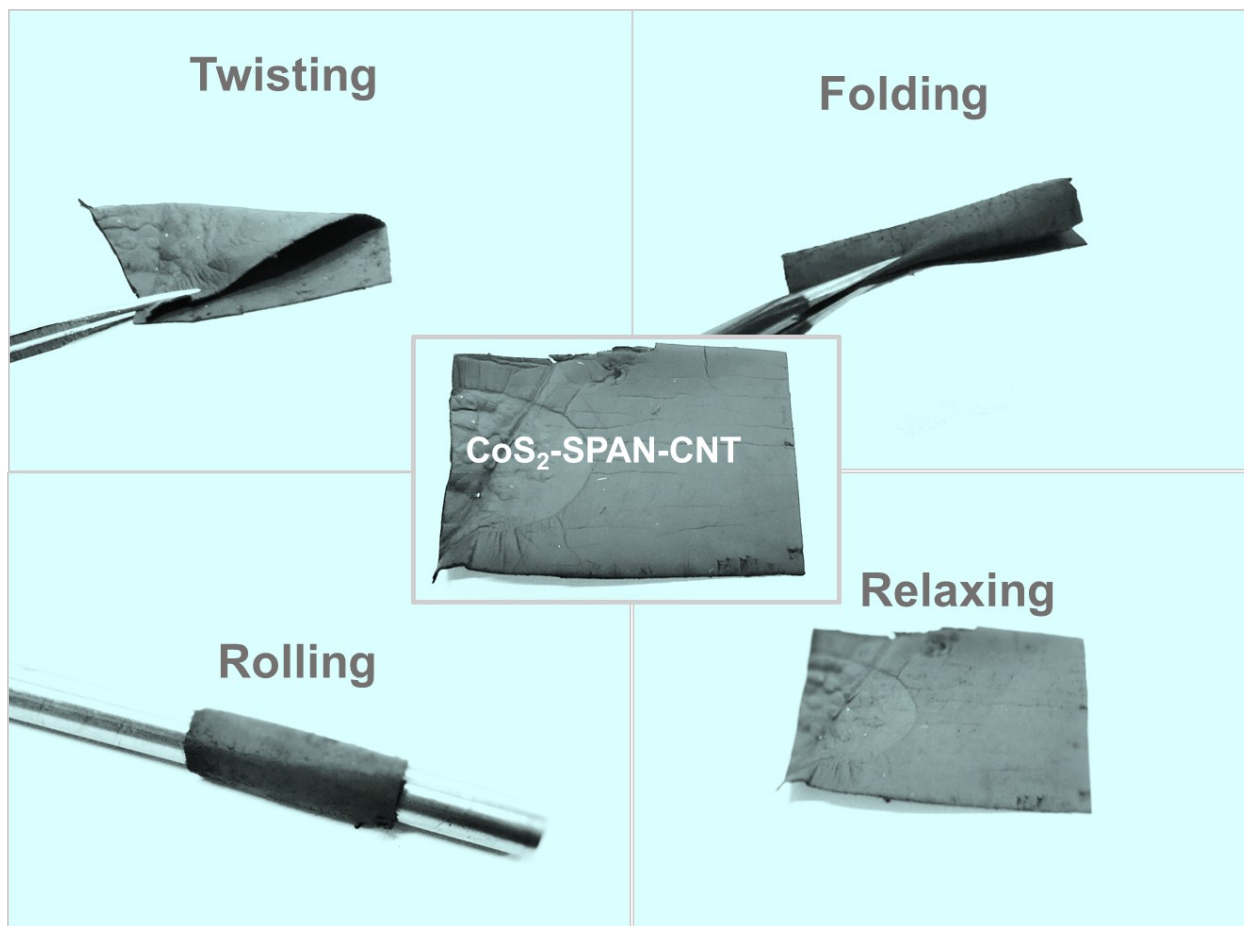

**Fig. S1** Photographs of the flexible CoS<sub>2</sub>-SPAN-CNT.

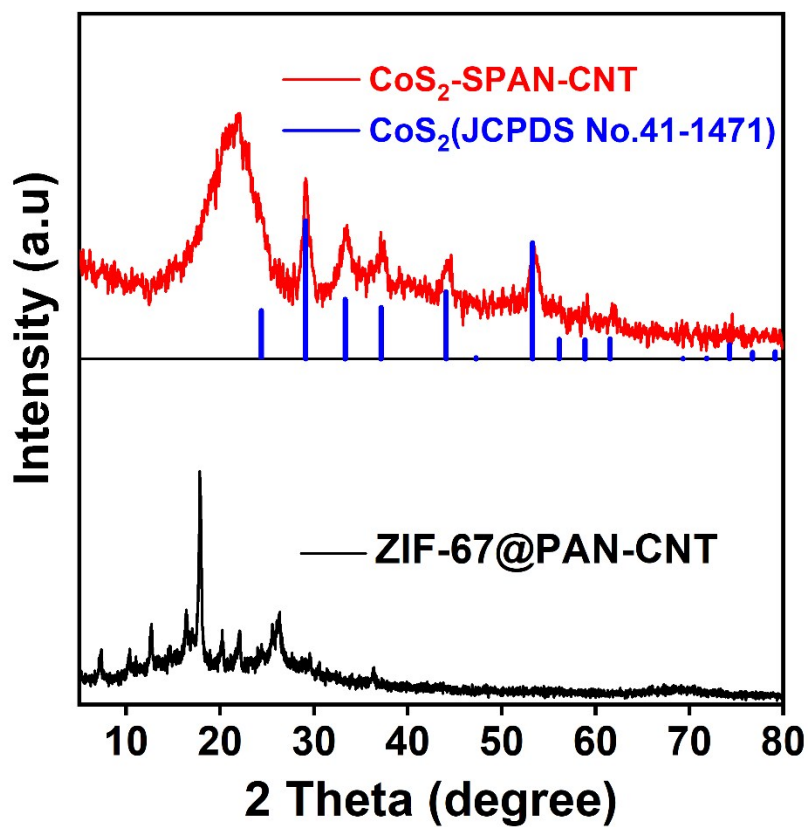

Fig. S2 XRD patterns of ZIF-67@PAN-CNT and  $\text{Co}_2\text{S}$ -SPAN-CNT.

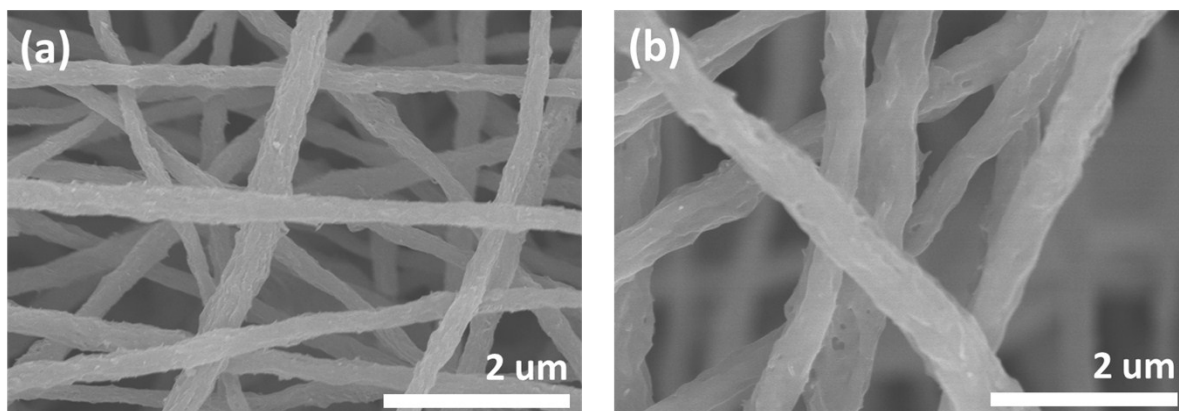

Fig. S3 FE-SEM images of (a) electrospun PAN-CNT and (b) SPAN-CNT.

**Table S1.** Electrode thickness and amount of electrolyte for composites with different sulfur loading.

| Sample                     | Sulfur loading (mg cm <sup>-2</sup> ) | Thickness (μm) | Electrolyte amount (μl) |
|----------------------------|---------------------------------------|----------------|-------------------------|
| CoS <sub>2</sub> -SPAN-CNT | 5.9                                   | 97             | 150                     |
| CoS <sub>2</sub> -SPAN-CNT | 4.9                                   | 90             | 120                     |
| CoS <sub>2</sub> -SPAN-CNT | 2.8                                   | 82             | 70                      |
| CoS <sub>2</sub> -SPAN-CNT | 2.4                                   | 77             | 60                      |
| CoS <sub>2</sub> -SPAN-CNT | 1.7                                   | 72             | 45                      |
| CoS <sub>2</sub> -SPAN-CNT | 0.7                                   | 64             | 20                      |
| SPAN-CNT                   | 2.4                                   | 294            | 60                      |
| CoS <sub>2</sub> -SPAN     | 2.4                                   | 95             | 60                      |
| SPAN                       | 2.4                                   | 302            | 60                      |

| Material                   | Specific Surface Area (m <sup>2</sup> g <sup>-1</sup> ) | Pore Volume (cm <sup>3</sup> g <sup>-1</sup> ) | Average Pore Size (nm) |
|----------------------------|---------------------------------------------------------|------------------------------------------------|------------------------|
| SPAN-CNT                   | 27.3                                                    | 0.08                                           | 16.6                   |
| CoS <sub>2</sub> -SPAN-CNT | 17.8                                                    | 0.08                                           | 17.4                   |

**Table S2.** BET analyses of CoS<sub>2</sub>-SPAN-CNT and SPAN-CNT.

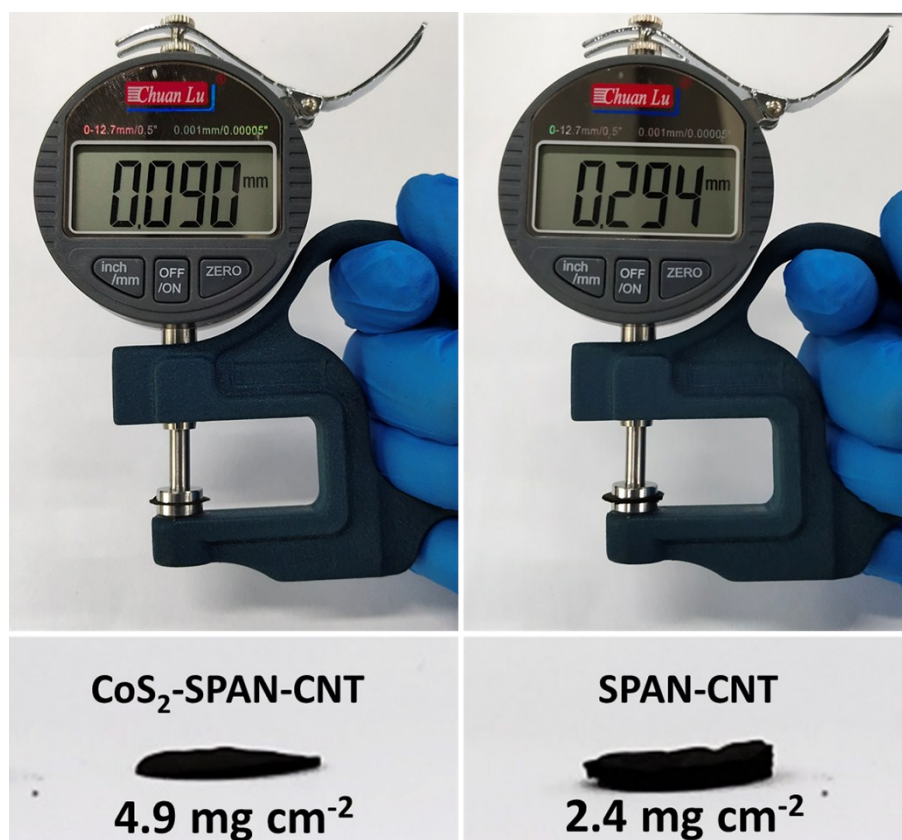

**Fig. S4** The thickness comparison of CoS<sub>2</sub>-SPAN-CNT and SPAN-CNT at specific sulfur loadings.

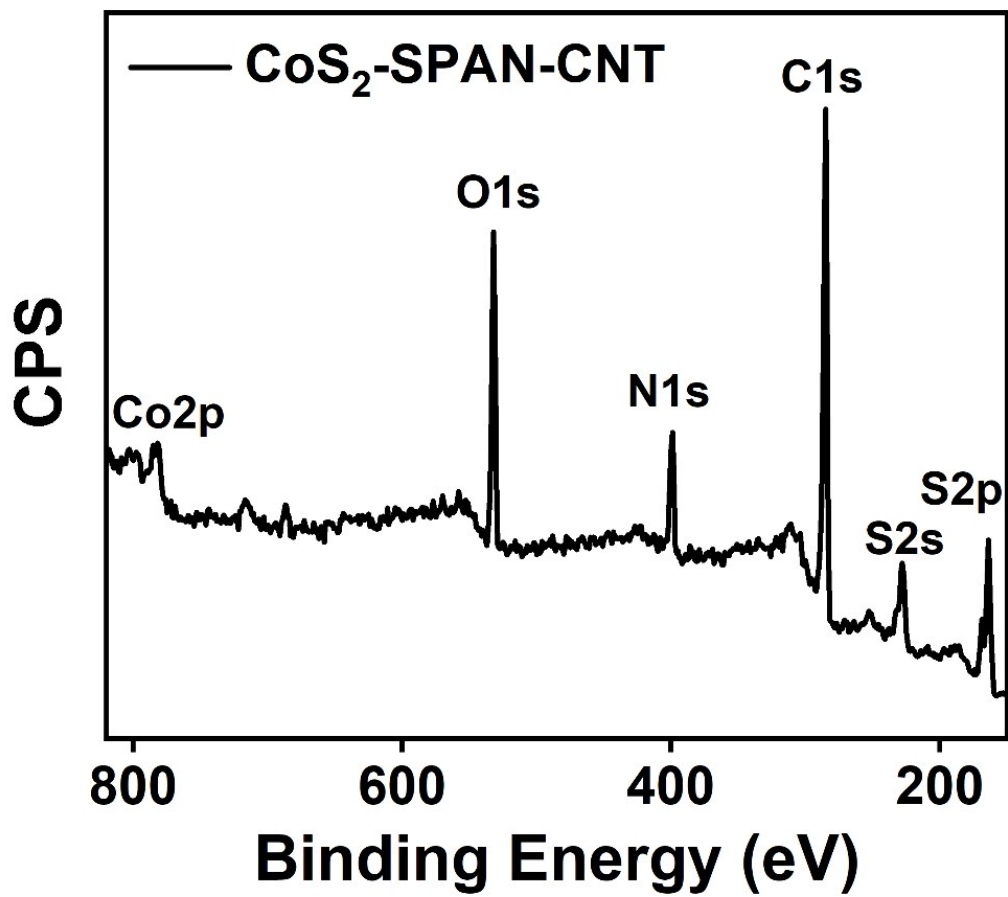

Fig. S5 XPS survey spectrum of CoS<sub>2</sub>-SPAN-CNT.

**Table S3.** ICP results of the CoS<sub>2</sub>-SPAN-CNT and CoS<sub>2</sub>-SPAN.

| <b>Material</b>                 | <b>Co wt%</b> |
|---------------------------------|---------------|
| <b>CoS<sub>2</sub>-SPAN</b>     | 5.7           |
| <b>CoS<sub>2</sub>-SPAN-CNT</b> | 4.3           |

| <b>Sample</b>                        | <b>Total S wt%</b> | <b>C wt%</b> | <b>N wt%</b> | <b>S wt%<br/>from<br/>SPAN</b> | <b>S wt%<br/>from<br/>CoS<sub>2</sub></b> |
|--------------------------------------|--------------------|--------------|--------------|--------------------------------|-------------------------------------------|
| <b>SPAN</b>                          | 42.5               | 41.4         | 14.4         | 42.5                           | -                                         |
| <b>SPAN-CNT</b>                      | 39.9               | 43.3         | 13.5         | 39.9                           | -                                         |
| <b>CoS<sub>2</sub>-SPAN</b>          | 44.6               | 42.2         | 13.8         | 38.4                           | 6.2                                       |
| <b>CoS<sub>2</sub>-SPAN-<br/>CNT</b> | 43.2               | 38.7         | 11.3         | 38.5                           | 4.7                                       |

**Table S4.** Elemental analysis of various composites.

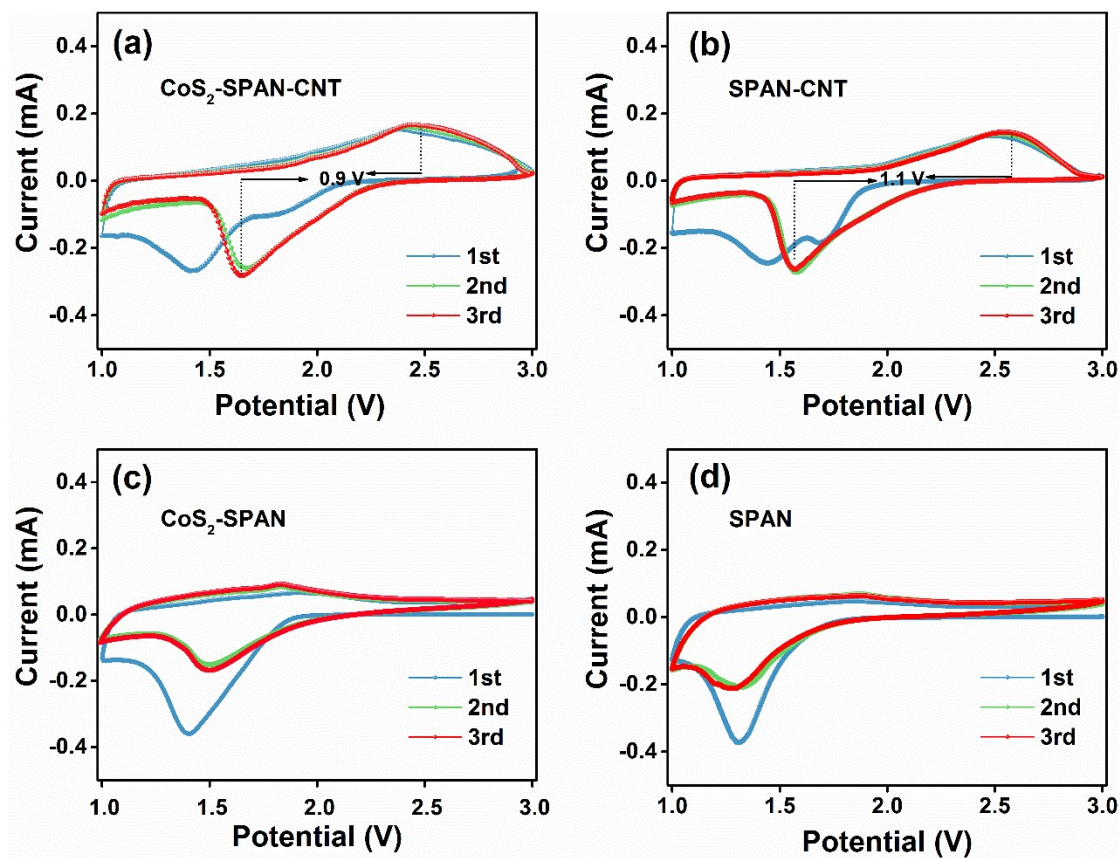

Fig. S6 Cyclic voltammetry profiles of (a) CoS<sub>2</sub>-SPAN-CNT, (b) SPAN-CNT, (c) CoS<sub>2</sub>-SPAN, and (d) SPAN.



**Table S5.** Electric conductivity measurements of SPAN, SPAN-CNT, and CoS<sub>2</sub>-SPAN-CNT.

| <b>Material</b>                 | <b>Electric conductivity (S/cm)</b> |
|---------------------------------|-------------------------------------|
| <b>SPAN</b>                     | N/A                                 |
| <b>CoS<sub>2</sub>-SPAN</b>     | $0.4 \times 10^{-4}$                |
| <b>SPAN-CNT</b>                 | $1.6 \times 10^{-3}$                |
| <b>CoS<sub>2</sub>-SPAN-CNT</b> | $1.9 \times 10^{-2}$                |

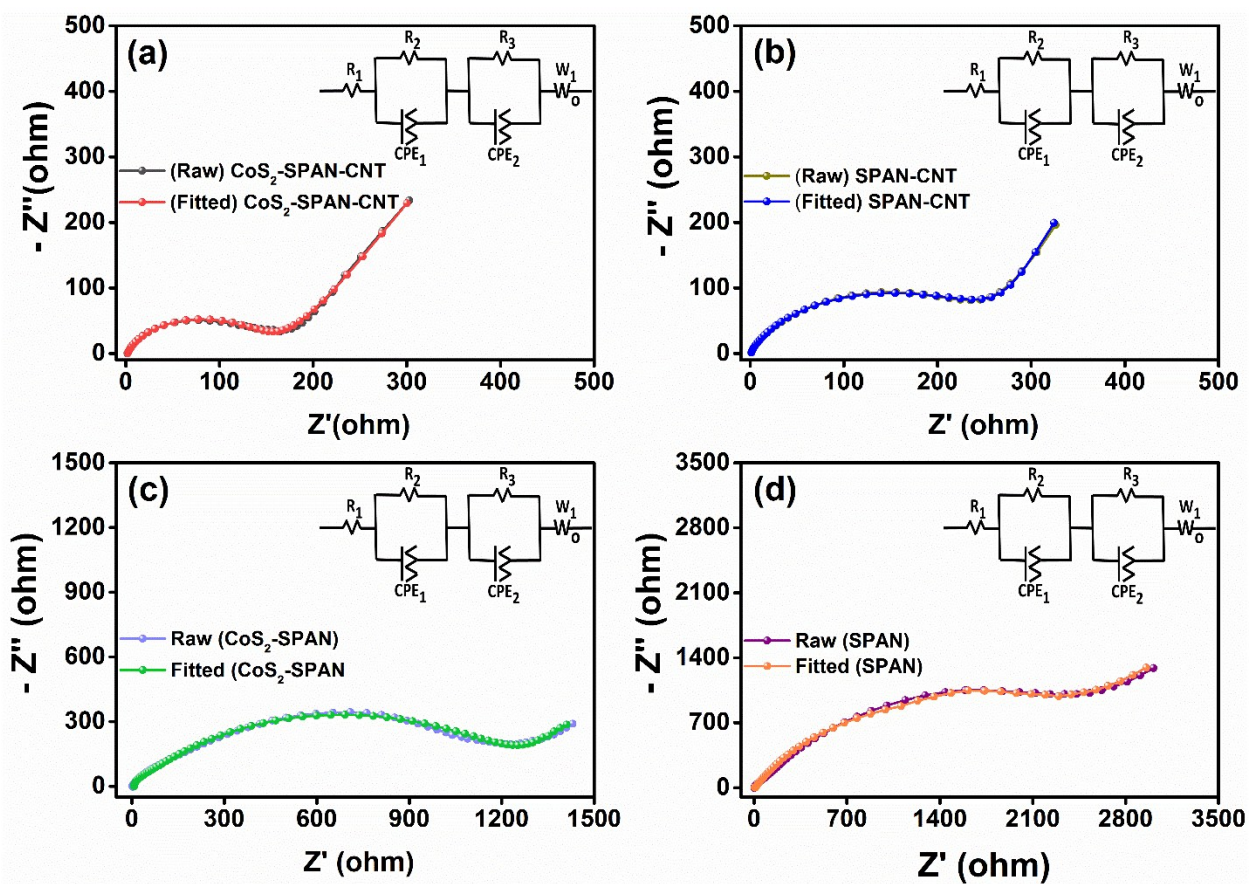

Fig. S7 EIS spectra of (a)  $CoS_2$ -SPAN-CNT, (b) SPAN-CNT, (c)  $CoS_2$ -SPAN, and (d) SPAN.

Table S6. EIS fitting data of  $CoS_2$ -SPAN-CNT, SPAN-CNT,  $CoS_2$ -SPAN and SPAN.

| Calculated Impedance Data | $CoS_2$ -SPAN-CNT | SPAN-CNT | $CoS_2$ -SPAN | SPAN  |
|---------------------------|-------------------|----------|---------------|-------|
| $R_1$ ( $\Omega$ )        | 2.157             | 4.723    | 7.776         | 8.453 |
| $R_2$ ( $\Omega$ )        | 180.9             | 277.2    | 1244          | 2549  |
| $R_3$ ( $\Omega$ )        | 27.24             | 75.62    | 167.3         | 946.2 |

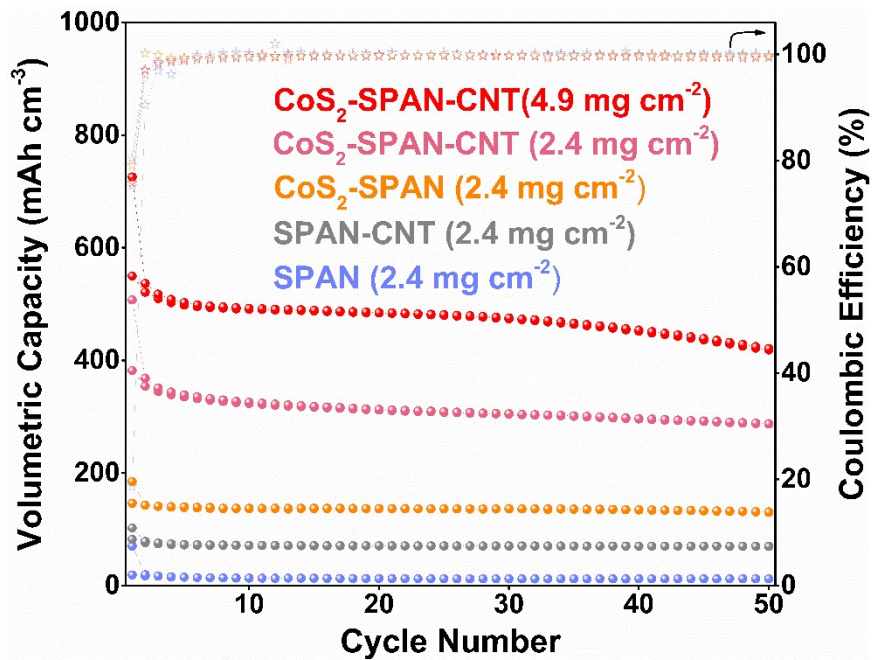

Fig. S8 Volumetric capacities of the CoS<sub>2</sub>-SPAN-CNT and control samples at 0.2 C.

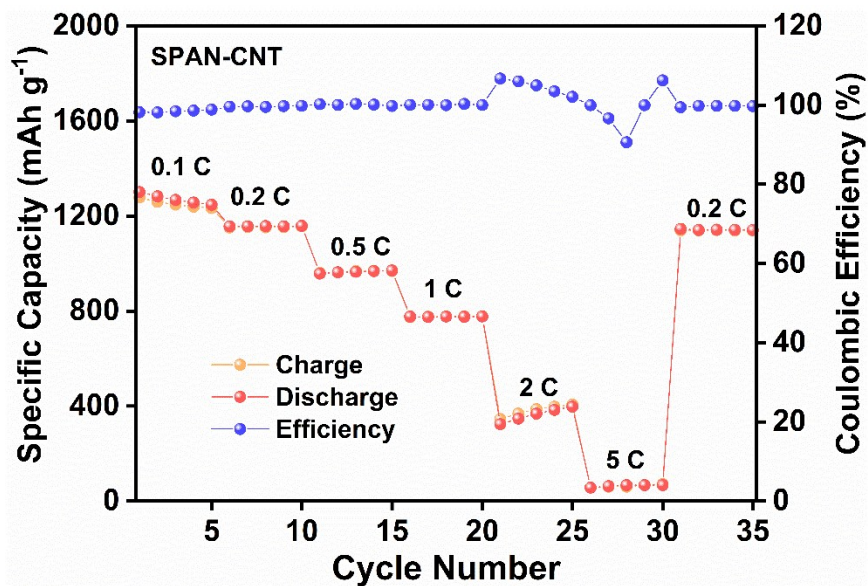

Fig. S9 Rate capability of SPAN-CNT.

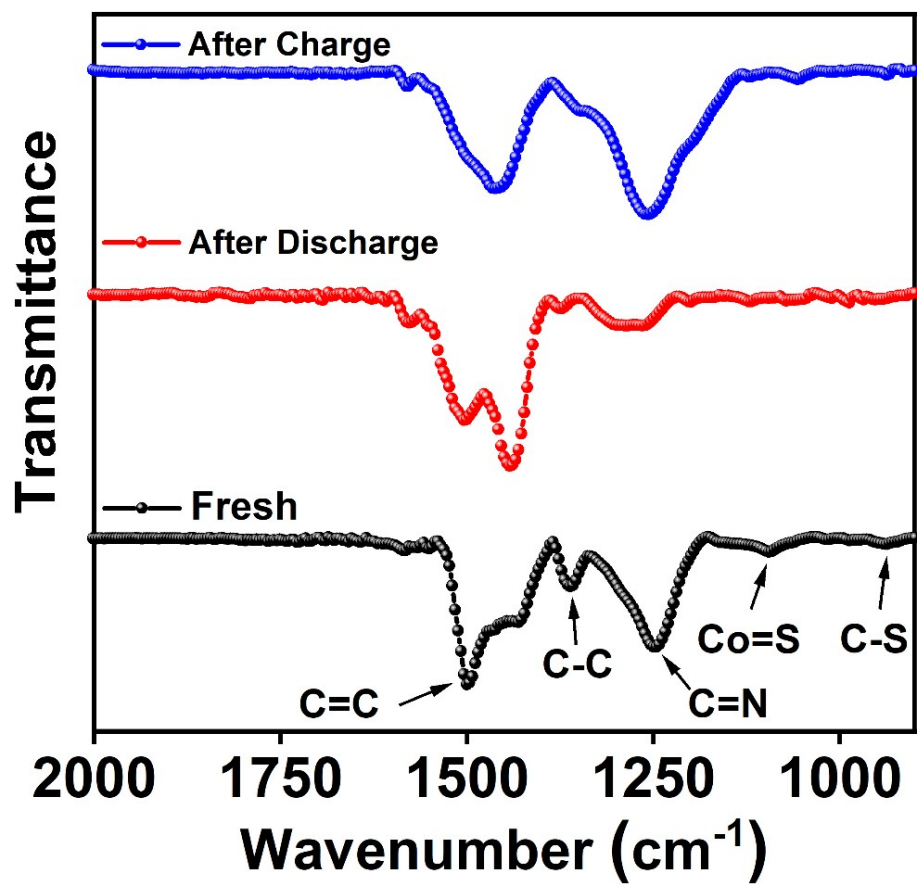

Fig. S10 *Ex-situ* FT-IR plots of the fresh and cycled  $\text{CoS}_2$ -SPAN-CNT.

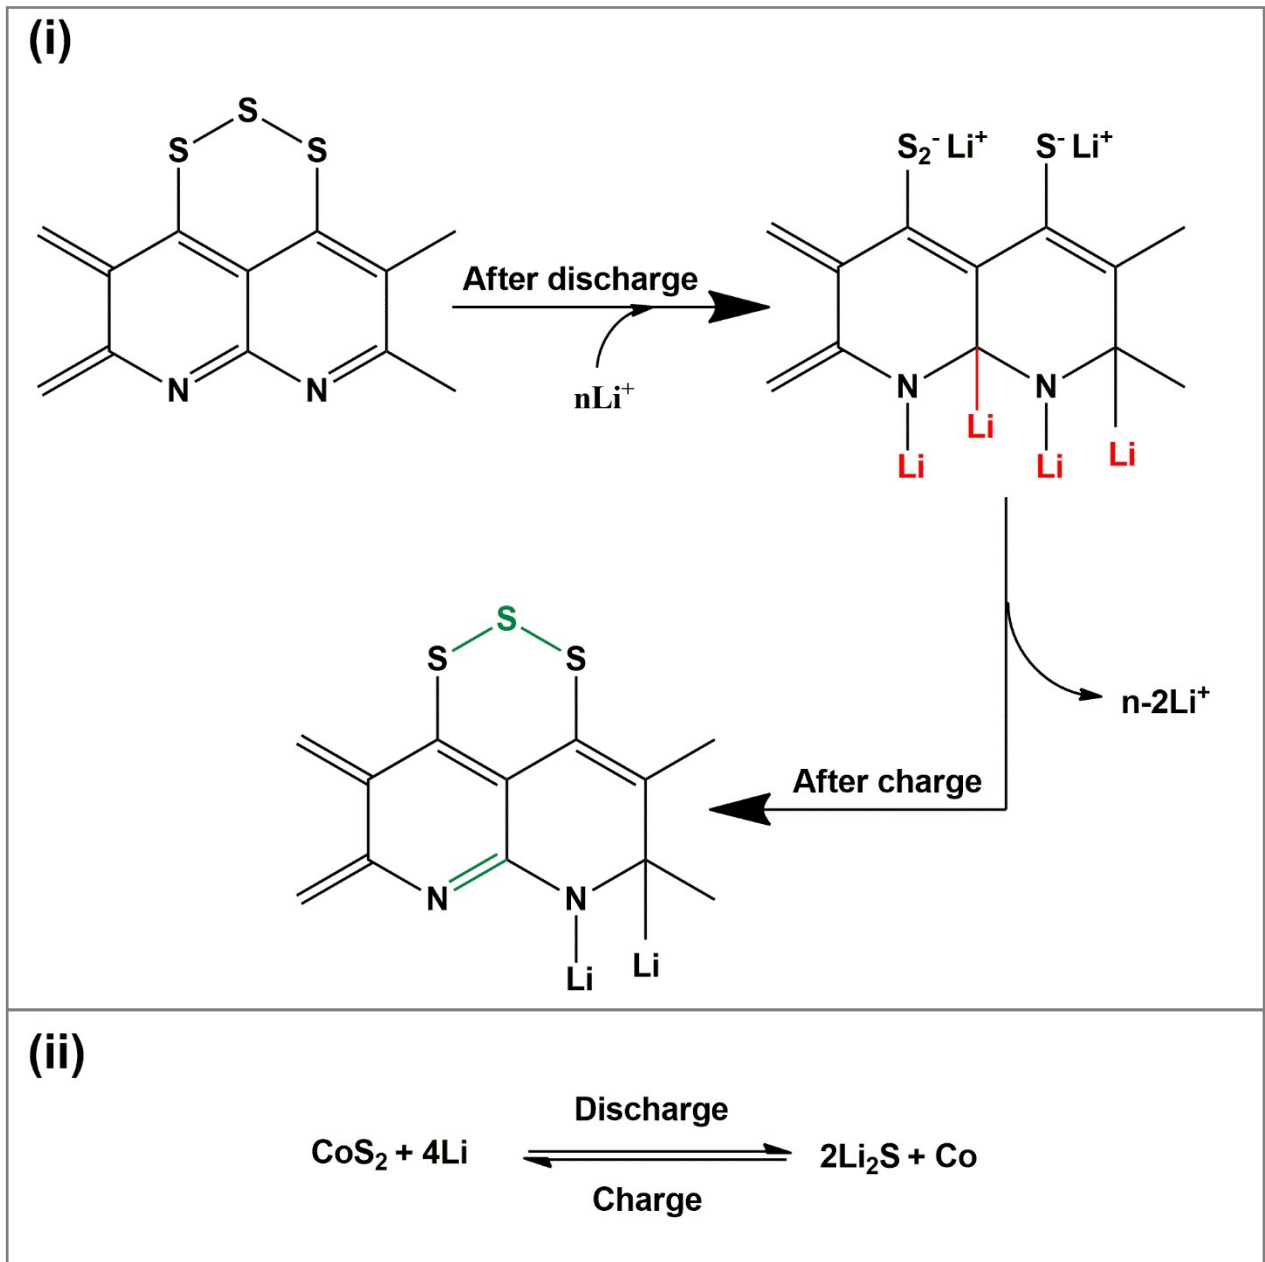

**Fig. S11** The proposed overall electrochemical lithiation/delithiation processes for  $\text{CoS}_2$ -SPAN-CNT.

**Table S7.** Comparison of CoS<sub>2</sub>-SPAN-CNT with previously reported SPAN cathodes in terms of sulfur loading and areal capacity.

| Material                                   | Current Collector  | Free-standing   | Sulfur loading (mg cm <sup>-2</sup> ) | Areal Capacity (mA h cm <sup>-2</sup> ) | Ref              |
|--------------------------------------------|--------------------|-----------------|---------------------------------------|-----------------------------------------|------------------|
| SPAN4                                      | Al foil            | None            | 0.4                                   | -                                       | [1]              |
| S/PAN/KB                                   | Carbon fiber paper | None            | 4.4                                   | -                                       | [2]              |
| SPAN                                       | Al foil            | None            | 0.7                                   | 1.0                                     | [3]              |
| S/Microporous carbon polyhedrons/PAN       | Al foil            | None            | 1.0                                   | -                                       | [4]              |
| CMK-3/S@PAN                                | Al foil            | None            | 2.1                                   | -                                       | [5]              |
| S@pPAN                                     | Al foil            | None            | 2.5                                   | -                                       | [6]              |
| pPAN/SeS <sub>2</sub>                      | Al foil            | None            | 7.9                                   | 4.5                                     | [7]              |
| Te <sub>0.04</sub> S <sub>0.96</sub> @pPAN | Al foil            | None            | 3.1                                   | -                                       | [8]              |
| Se <sub>0.06</sub> SPAN                    | Al foil            | None            | 3.1                                   | -                                       | [9]              |
| S/PAN/MWCNT                                | None               | flexible        | 3.0                                   | -                                       | [10]             |
| S/PAN/GO                                   | None               | flexible        | 2.5                                   | -                                       | [11]             |
| SPAN-CNT20                                 | None               | flexible        | 1.1                                   | -                                       | [12]             |
| S/DPAN/KB                                  | None               | flexible        | 1.5                                   | 1.7                                     | [13]             |
| SPAN/CNT-12                                | None               | flexible        | 2.0                                   | -                                       | [14]             |
| <b>CoS<sub>2</sub>-SPAN-CNT</b>            | <b>None</b>        | <b>flexible</b> | <b>4.6</b>                            | <b>6.5</b>                              | <b>This Work</b> |
|                                            |                    |                 | <b>5.9</b>                            | <b>8.1</b>                              |                  |

1. S. Wei, L. Ma, K. E. Hendrickson, Z. Tu and L. A. Archer, *J. Am. Chem. Soc.*, 2015, **137**, 12143-12152.
2. H. Sohn, M. L. Gordin, M. Regula, D. H. Kim, Y. S. Jung, J. Song and D. Wang, *J. Power Sources*, 2016, **302**, 70-78.
3. M. Frey, R. K. Zenn, S. Warneke, K. Müller, A. Hintennach, R. E. Dinnebier and M. R. Buchmeiser, *ACS Energy Lett.*, 2017, **2**, 595-604.
4. Y.-Z. Zhang, Z.-Z. Wu, G.-L. Pan, S. Liu and X.-P. Gao, *ACS App. Mater. Interfaces*, 2017, **9**, 12436-12444.
5. C. Hu, H. Chen, Y. Shen, D. Lu, Y. Zhao, A.-H. Lu, X. Wu, W. Lu and L. Chen, *Nat. commun.*, 2017, **8**, 479.
6. Z.-Q. Jin, Y.-G. Liu, W.-K. Wang, A.-B. Wang, B.-W. Hu, M. Shen, T. Gao, P.-C. Zhao and Y.-S. Yang, *Energy Storage Mater.*, 2018, **14**, 272-278.
7. Z. Li, J. Zhang, Y. Lu and X. W. D. Lou, *Sci. Adv.*, 2018, **4**, 1687.
8. S. Li, Z. Han, W. Hu, L. Peng, J. Yang, L. Wang, Y. Zhang, B. Shan and J. Xie, *Nano Energy*, 2019, **60**, 153-161.
9. X. Chen, L. Peng, L. Wang, J. Yang, Z. Hao, J. Xiang, K. Yuan, Y. Huang, B. Shan and L. Yuan, *Nat. commun.*, 2019, **10**.
10. A. Mentbayeva, A. Belgibayeva, N. Umirov, Y. Zhang, I. Taniguchi, I. Kurmanbayeva and Z. Bakenov, *Electrochim. Acta*, 2016, **217**, 242-248.
11. H. Peng, X. Wang, Y. Zhao, T. Tan, Z. Bakenov and Y. Zhang, *Polymers*, 2018, **10**, 399.
12. A. A. Razzaq, Y. Yao, R. Shah, P. Qi, L. Miao, M. Chen, X. Zhao, Y. Peng and Z. Deng, *Energy Storage Mater.*, 2019, **16**, 194-202.
13. S. Kalybekkyzy, A. Mentbayeva, M. V. Kahraman, Y. Zhang and Z. Bakenov, *J. Electrochem. Soc.*, 2019, **166**, A5396-A5402.
14. X. Wang, Y. Qian, L. Wang, H. Yang, H. Li, Y. Zhao and T. Liu, *Adv. Funct. Mater.*, 2019, **29**, 1902929.

## References
